# Supplementary material
Source: PubMed Central journal article supplement (PMC4817430)

## SUPPLEMENTARY DATA

Figure S1. Boxplots showing admixture coefficient ( $Q$ ) values for *Quercus petraea*, *Q. robur* and hybrids by population.

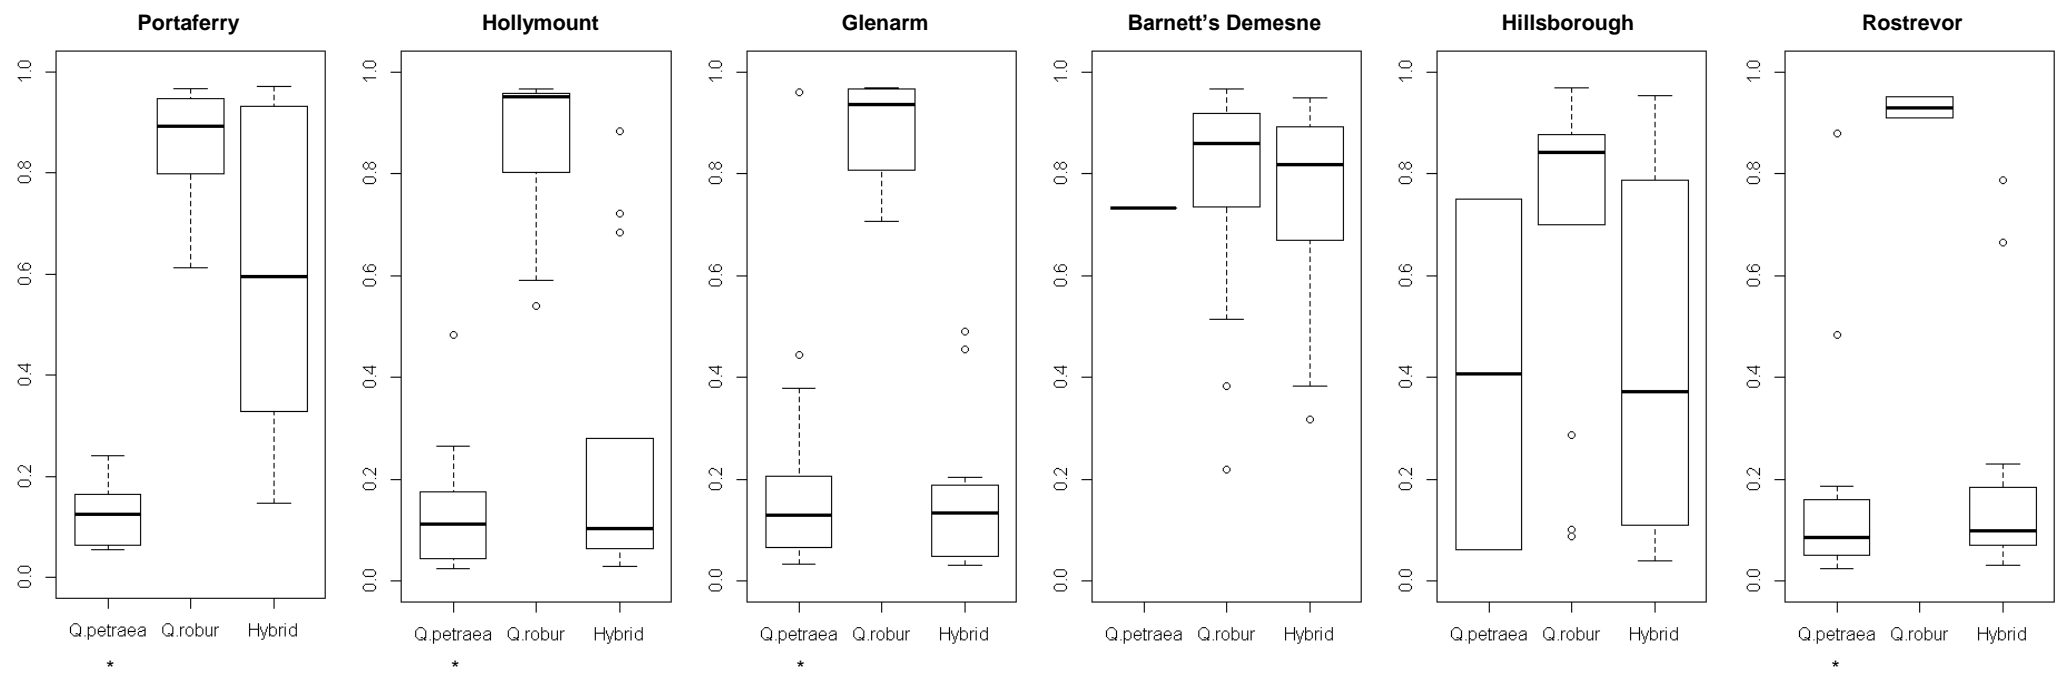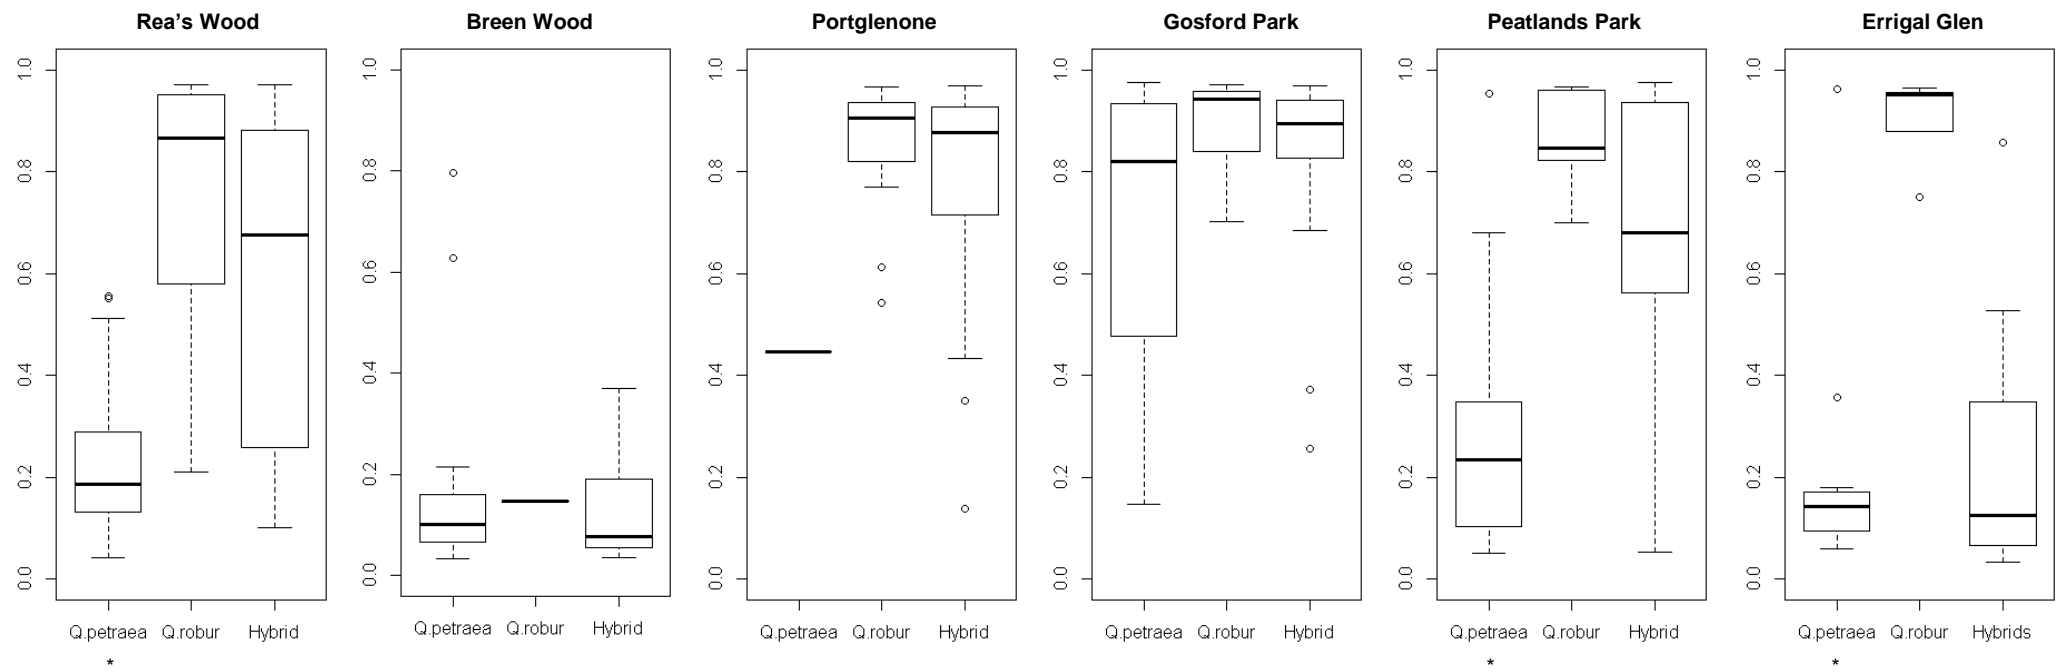

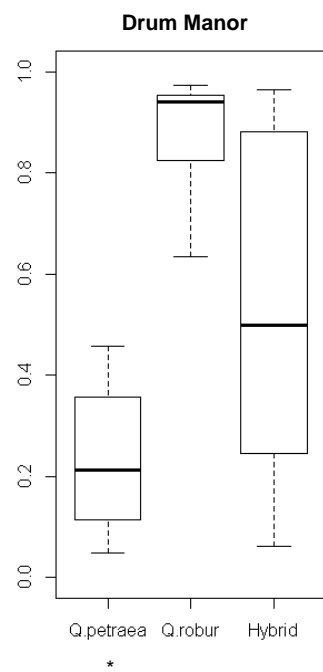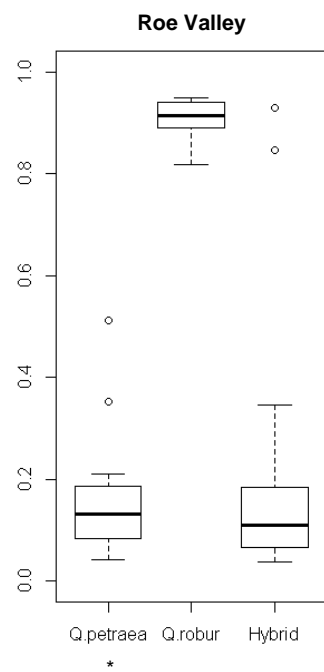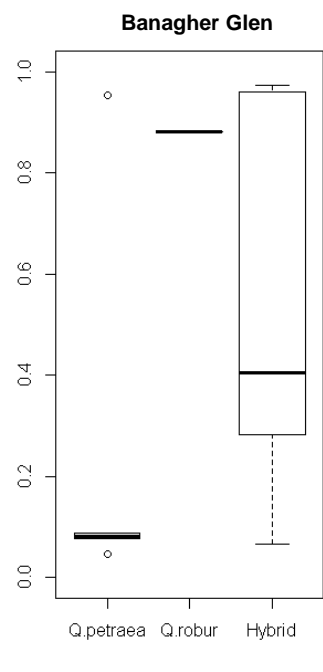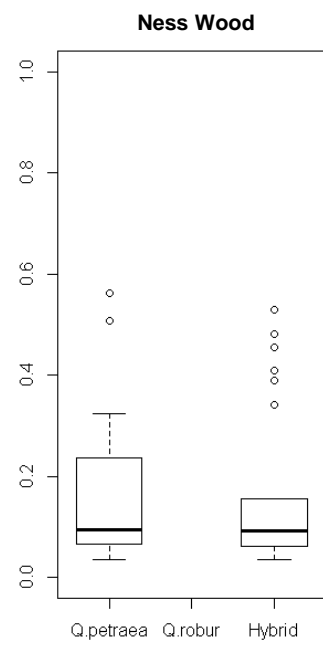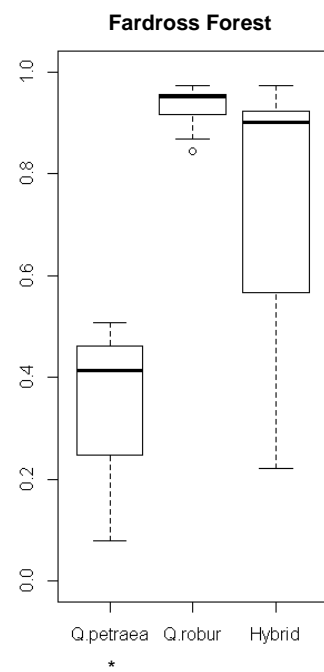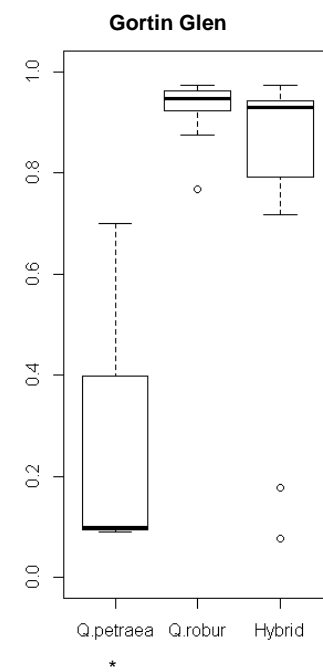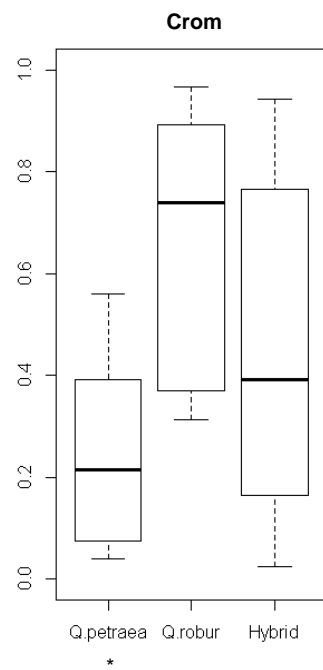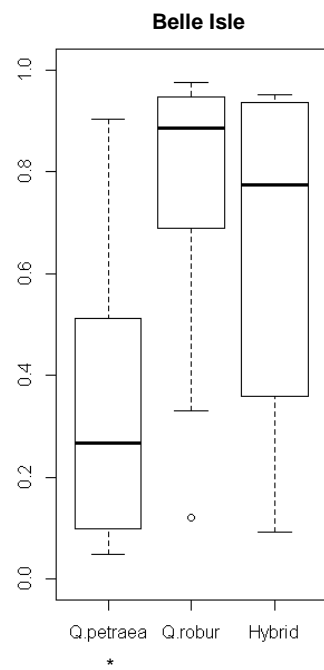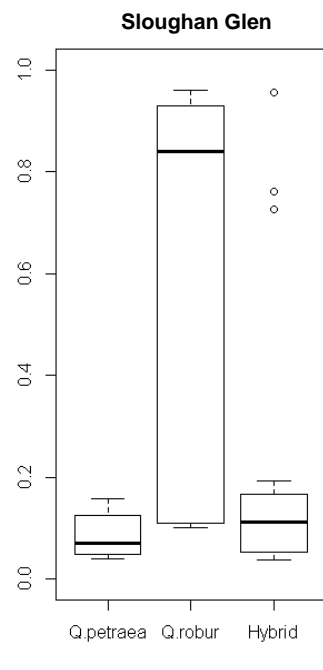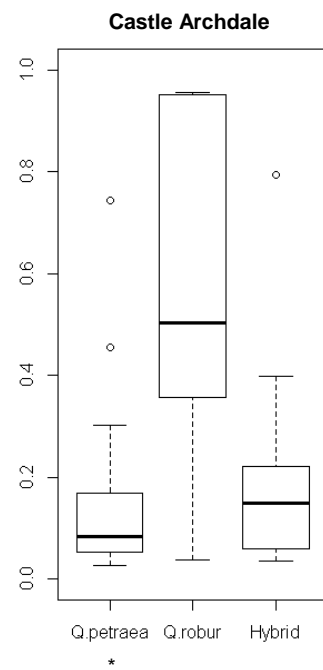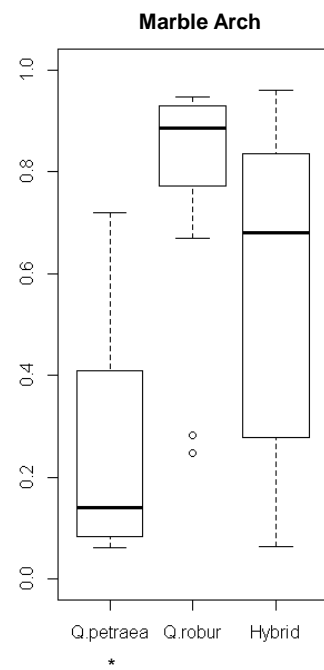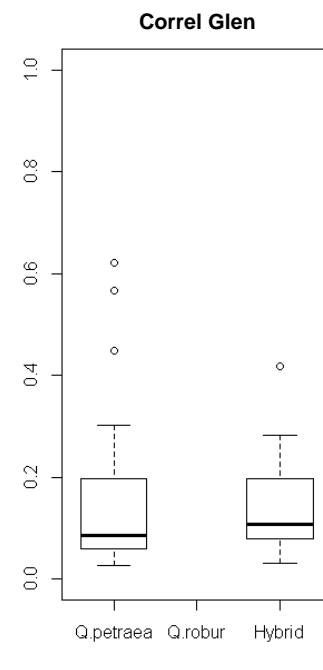

Supplement: supp_mcw002_aob-15603-s01_NEW.pdf [file supp_mcw002_aob-15603-s01_NEW.pdf]
